# Supplementary material
Source: publisher site journal article supplement (https://www.spandidos-publications.com/3655/downloadSupplementary)
Supplement: Supplementary file 1 [file downloadSupplementary]

## Sheet: Sheet1
Table SIX. Raw data of standard samples of CTSS, ITIH4, PROS1 and PRDX2 determined by ELISA.
A, CTSS samples
Standard curve line	Curve Expert 1.4			Calibration OD value	Concentration, pg/ml
	OD1	OD2	Average OD value
S7	1.8022	1.7673	1.78475	1.66655	4000
S6	1.3763	1.4342	1.40525	1.28705	2000
S5	0.8823	0.899	0.89065	0.77245	1000
S4	0.6339	0.652	0.64295	0.52475	500
S3	0.4282	0.4217	0.42495	0.30675	250
S2	0.3606	0.3359	0.34825	0.23005	125
S1	0.2882	0.2554	0.2718	0.1536	62.5
S0	0.1147	0.1217	0.1182	0	0
B, ITIH4 samples
Standard curve line	Curve Expert 1.4			Calibration OD value	Concentration, pg/ml
	OD1	OD2	Average OD value
S7	2.3066	2.4235	2.36505	2.24295	4000
S6	1.8342	1.7696	1.8019	1.6798	2000
S5	1.0224	1.0648	1.0436	0.9215	1000
S4	0.9432	0.9216	0.9324	0.8103	500
S3	0.5238	0.5352	0.5295	0.4074	250
S2	0.3244	0.3546	0.3395	0.2174	125
S1	0.1846	0.1773	0.18095	0.05885	62.5
S0	0.1225	0.1217	0.1221	0	0
C, PROS1 samples
Standard curve line	Curve Expert 1.4			Calibration OD value	Concentration, pg/ml
	OD1	OD2	Average OD value
S7	2.2764	2.2973	2.28685	2.28685	200
S6	1.8227	1.7447	1.7837	1.7837	100
S5	1.0841	1.1145	1.0993	1.0993	50
S4	0.7204	0.6516	0.686	0.686	25
S3	0.4762	0.4026	0.4394	0.4394	12.5
S2	0.3316	0.339	0.3353	0.3353	6.25
S1	0.1988	0.1764	0.1876	0.1876	3.12
S0	0.1429	0.138	0.14045	0.14045	0
D, PRDX2 samples
Standard curve line	Curve Expert 1.4			Calibration OD value	Concentration, pg/ml
	OD1	OD2	Average OD value
S7	2.3452	2.2769	2.31105	2.17035	200
S6	1.7936	1.7458	1.7697	1.629	100
S5	1.0692	1.109	1.0891	0.9484	50
S4	0.7168	0.6878	0.7023	0.5616	25
S3	0.4552	0.4026	0.4289	0.2882	12.5
S2	0.3327	0.338	0.33535	0.19465	6.25
S1	0.1896	0.1754	0.1825	0.0418	3.12
S0	0.1448	0.1366	0.1407	0	0
CTSS, cathepsin S; ITIH4, inter α-trypsin inhibitor heavy chain H4; PROS1, protein S isoform 1; PRDX2, peroxiredoxin-2.
